1 **Variations in soil nutrient dynamics and bacterial communities in long-term tea**  
2 **monoculture production systems**

3

4 Heng Gui<sup>1,2,3</sup>, Lichao Fan<sup>1,4\*</sup>, Donghui Wang<sup>1</sup>, Peng Yan<sup>1</sup>, Xin Li<sup>1</sup>, Yinghua Pang<sup>4</sup>,  
5 Liping Zhang<sup>1</sup>, Kazem Zamanian<sup>4,6</sup>, Jianchu Xu<sup>2,3</sup>, Wenyan Han<sup>1\*</sup>

6 <sup>1</sup> Tea Research Institute, Chinese Academy of Agricultural Sciences, Hangzhou  
7 310008, China

8 <sup>2</sup> CAS Key Laboratory for Plant Diversity and Biogeography of East Asia, Kunming  
9 Institute of Botany, Chinese Academy of Sciences, Kunming, 650201, China

10 <sup>3</sup> Honghe Center for Mountain Futures, Kunming Institute of Botany, Chinese  
11 Academy of Sciences, Honghe County 654400, Yunnan, China

12 <sup>4</sup> Department of Soil Science of Temperate Ecosystems, University of Göttingen,  
13 Göttingen 37077, Germany

14 <sup>5</sup> Bureau of Agriculture and Rural Affairs of the Yuhang District, Hangzhou, 310008,  
15 China

16 <sup>6</sup> School of Geographical Sciences, Nanjing University of Information Science and  
17 Technology, Ningliu Road 219, Nanjing 210044, China

18

19 Corresponding Authors: Lichao Fan, [flxesy@126.com](mailto:flxesy@126.com), Wenyan Han  
20 [hanwy@tricaas.com](mailto:hanwy@tricaas.com)

21

22

23

24 **Abstract**

25 Long-term monoculture agriculture systems could lead to soil degradation and yield  
26 decline. The ways in which soil microbiotas interact with one another, particularly in  
27 response to long-term tea monoculture systems are currently unclear. In this study,  
28 through the comparison of three independent tea plantations across eastern China  
29 composed of varying stand ages (from 3 years to 90 years after conversion from  
30 forest), we found that long-term tea monoculture led to significant increases in soil  
31 total organic carbon (TOC) and microbial nitrogen (MBN). Additionally, the structure,  
32 function and co-occurrence network of soil microbial communities were investigated  
33 by pyrosequencing 16S rRNA genes. The pyrosequencing analysis revealed that  
34 structures and functions of soil bacterial communities were significantly affected by  
35 different stand ages of tea plantations, but sampling sites and land-use conversion  
36 (from forest to tea plantation) still outcompeted stand age to control the diversity and  
37 structure of soil bacterial communities. Further RDA analysis revealed that the C and  
38 N availability improvement in tea plantation soils led to variation of structure and  
39 function in soil microbial communities. Moreover, co-occurrence network analysis of  
40 soil bacterial communities also demonstrated that interactions among soil bacteria  
41 taxa were strengthened with the increasing stand age of respective tea stands. Overall,  
42 this study provides a comprehensive understanding of the impact of long-term  
43 monoculture stand age on soil nutrient dynamics and bacterial communities in tea  
44 production.

45 **Keywords:** Tea production, Pyrosquencing, monoculture system, co-occurrence  
46 network, nutrient availability

47

## 48 **1. Introduction**

49 Soil microbial communities play an indispensable role in maintaining soil health and  
50 nutrient cycling (Bünemann et al., 2018; Torsvik et al., 1996) and are strongly  
51 affected by environmental factors (e.g., soil pH, soil texture, nutrients availability)  
52 (Geisseler and Scow, 2014; Girvan et al., 2003; Lauber et al., 2009), plant species (El  
53 Zahar Haichar et al., 2008), land management (Rodrigues et al., 2013), and locations  
54 (Decaëns, 2010; Fierer and Jackson, 2006; Martiny et al., 2006). Among these factors,  
55 land use change is the most impactful factor via that human disturb soil environmental  
56 conditions, thereby altering the structure, diversity, and biomass of bacterial  
57 communities (Da C Jesus et al., 2009). The type of vegetation planting (El Zahar  
58 Haichar et al., 2008) and management (Geisseler and Scow, 2014) along a  
59 chronosequence (i.e. land-use duration) after land use conversion play important roles  
60 in controlling the variation of soil bacterial communities. This is because of reshaping  
61 the soil structure, accumulation of soil nutrients and hazardous substances.

62 Microorganisms usually form complex interactive networks in which interactions  
63 among members are essential for community assembly and ecosystem functions  
64 (Deng et al., 2016; Shi et al., 2016). Therefore, identifying and defining the  
65 interactions that occur among soil microorganisms are critical to understanding  
66 microbial diversity and functions (Banerjee et al., 2016). Network analysis of

67 co-occurrence, as usually determines by correlations between abundances of  
68 microbial taxa provides a promising start for exploring the organization and dynamics  
69 of microbial interactions and niches (Barberán et al., 2012; Chen et al., 2019; Jiao et  
70 al., 2016). Exploring these microbial interactions, rather than those of simple richness  
71 and composition involved in soil environment, especially in agriculture soils, can  
72 provide important information on plant health and growth (Banerjee et al., 2016;  
73 Zhang et al., 2018). Recent advances in high-throughput sequencing approaches now  
74 enable us to apply network analyses to explore more information in the complex  
75 uncultivated soil microbial communities of agricultural land. For example to define  
76 network complexity or stability between microbial communities and environmental  
77 factors (Ma et al., 2020) or identifying potential keystone species (Fan et al., 2018) or  
78 geographical patterns at a continental scale (Zhang et al., 2018). However, there is  
79 little information about topological variation found in soil microbial co-occurrence  
80 interactions in long-term monoculture agricultural systems.

81 Tea (*Camellia sinensis* L.) is a perennial evergreen broad-leaved cash crop (Han et al.,  
82 2007), and tea is one of the top three consumed beverages in the world. Tea  
83 plantations are typically established by conversion from forest and with years  
84 (decades to centuries) of intensively managed cultivation practices (Han et al., 2007).  
85 Most tea plantations are distributed in subtropical areas, and over 3.06 million ha are  
86 established in China, a figure which is only increasing (Fan and Han, 2020). Soil  
87 degradation is one potential issue arising from long-term monoculture of tea  
88 plantations (Yan et al., 2018; Yan et al., 2020), though providing an accumulation of

89 C and N (Fan and Han, 2020; Fan et al., 2015). To better understand the mechanisms  
90 undergirding soil nutrients-cycling network in tea plantations, that promotes soil  
91 fertility as well as production and quality of tea, it is of vital importance to document  
92 the influence of land-use change and long-term monoculture on soil microbiomes in  
93 tea plantations. Accordingly, increased attention has been concentrated on soil  
94 microbiomes in tea plantations, such as microbial community structure and microbial  
95 biomass as affected by the stand age of tea plantations (Wang et al., 2019). However,  
96 the relative importance of long-term monoculture systems and spatial variation on the  
97 structure and function of bacterial communities in tea plantations remains unclear.  
98 Here, we analyzed soil bacteria communities via pyrosequencing analysis at varying  
99 stand ages (from 3 to 90 years) across tea plantations at three separate sites (Fig. S1)  
100 and their adjacent forests. Our study aimed to answer the following research  
101 questions:

- 102 i. How do stand age (time after land conversion) and the sites affect the structure  
103 and function of soil bacterial communities in tea plantations?
- 104 ii. Which possible environmental factors could lead to the changes in soil  
105 bacterial communities described in i.?
- 106 iii. How does stand age affect the interactions in soil bacterial communities in tea  
107 plantations based on co-occurrence network analysis?

108

## 109 **2. Materials and methods**

### 110 **2.1. Experimental design and soil sampling**

111 The sampling of tea plantation sites is shown in Fig. S1, and selected environmental  
112 information is provided in Table S1. In general, three tea plantations composed of tea  
113 stands with varying stand ages in Zhejiang Province, China were chosen for  
114 comparing changes in soil bacterial communities between different tea stand ages.  
115 The first one was located in Jingning County, Lishui City (JL), in which three tea  
116 stands aged 3 (Y3), 21 (Y21), and 43 (Y43) years were selected. The second was at  
117 the Tea Research Institute of the Chinese Academy of Agricultural Sciences (TRI), in  
118 which two tea stands aged 10 (Y10) and 90 (Y90) years were selected. The last one  
119 was located in Wenjiashan Village, Hangzhou City (HZ), in which three tea stands  
120 aged 13 (Y13), 50 (Y50), and 90 (Y90) years were selected. For these three different  
121 sites the annual mean temperature is 17 °C, ranging from 1.7 °C in January to 33.0 °  
122 C in July. The annual mean precipitation is 1533 mm, with 74% of total rainfall  
123 occurring during the tea growing season from March to September. At JL and HZ sites,  
124 one forest (the land use prior to clearing and planting tea) adjacent to tea stand was  
125 selected for comparison. As described in Han et al. (2007), forest vegetation in both  
126 HZ and JL sites was dominated by *Cyclobalanopsis glauca* and *Quercus acutissima*  
127 Carri. The management for different tea stands at each tea plantation were similar.  
128 As described in our previous study (Han et al., 2007), 2250 kg ha<sup>-1</sup> organic fertilizer  
129 (mainly rape seed cake containing 45% organic C, 4.6% N, 0.9% P, and 1.2% K) or  
130 1500 kg ha<sup>-1</sup> compound fertilizer containing approximate 8% N, 3.4% P, and 6.6% K  
131 was applied every September or October.

132

133 **2.2. Soil sampling and treatments**

134 For each tea stand at each tea plantation, three 400 m<sup>2</sup> plots of representative soil were  
135 randomly selected for soil collection. For each plot, eight random soil sub-samples at  
136 0-20 cm depth were taken and mixed into one independent soil sample for later  
137 related analysis. Before soil sampling, the litter layer was removed at each plot. The  
138 soil was sieved using a 2 mm pore-size screen to remove plant roots, stones, and soil  
139 fauna. Each independent soil sample was divided into two parts. One part (50g) was  
140 stored at 4 °C for later soil physicochemical analysis. The other part (10g) was stored  
141 at – 80 °C for later DNA extraction.

142

143 **2.3. Soil physicochemical properties analysis**

144 Soil pH was determined by a combination of glass electrodes using a 1: 2.5 (w: v)  
145 ratio of soil to distilled water. Soil total C (TOC) and N (TON) were measured by  
146 LECO CNS Combustion Analyzer (LECO, CNS 2000, LECO Corporation, Michigan,  
147 USA) following manufacturer protocol. Soil microbial biomass C (MBC) and N  
148 (MBN) were determined following the fumigation-extraction method. Available  
149 phosphorus (AP) was extracted using hydrochloric acid and ammonium fluoride and  
150 determined using the molybdenum blue method. The concentration of exchangeable  
151 K (Exch. K), Ca (Exch. Ca), Mg (Exch. Mg), and Na (Exch. Na) were tested following  
152 hot block acid digestion protocol (Huang, Schulte et al. 1985).

153

154 **2.4. Soil microbial DNA extraction and PCR amplification**

155 Total DNA was extracted from about 0.5g of soil from each sample using the Mo Bio  
156 PowerSoil DNA isolation kit (Carlsbad, CA, USA) according to the manufacture's  
157 instruction. After extraction, quality and concentration of DNA were tested using the  
158 NanoDrop ND 200 spectrophotometer (Thermo Scientific, USA). In accordance with  
159 the concentration, all DNA samples were diluted to 1 ng/uL before PCR  
160 amplification.

161 The V4 and V5 variable region of the bacterial 16S rRNA gene was amplified using  
162 the primers 515F (5'-CCATCTCATCCCTGCGTGTCTCCGAC-3') and 907R  
163 (5'-CCTATCCCCTGTGTGCCTTGGCAGTC-3'). The polymerase chain reaction  
164 (PCR) amplification mixture was prepared with 1 µL purified DNA template (10 ng),  
165 5 µL 10 × PCR buffer, 2.25 mmol L<sup>-1</sup> MgCl<sub>2</sub>, 0.8 mmol L<sup>-1</sup> deoxyribonucleotide  
166 triphosphate (dNTP), 0.5 µmol L<sup>-1</sup> of each primer, 2.5 U Taq DNA polymerase, and  
167 sterile filtered milli-Q water to a final volume of 50 µL. All reactions were carried out  
168 in a PTC-200 thermal cycler (MJ Research Co., New York, USA). PCR cycles  
169 included a 4 min initial denaturation at 94 °C, followed by 30 cycles of denaturation  
170 at 94 °C for 1 min, annealing at 53 °C for 30 s, extension at 72 °C for 1 min, and a  
171 5-min final elongation step at 72 °C. PCR products were quality-screened and purified  
172 using the Qiagen Gel Extraction kit (Qiagen, Hilden, Germany).

173

#### 174 **2.5. 454 pyrosequencing and sequencing processing**

175 Pyrosequencing was performed on a Roche Genome Sequencer FLX+ using Titanium  
176 chemistry by Macrogen (Roche Applied Science, Mannheim, Germany). Three



177 standard flow-gram format (SFF) files were generated by 454 pyrosequencing. The  
178 SFF file was analyzed by the software package mothur (version 1.33.2) following the  
179 protocol provided by [https://mothur.org/wiki/454\\_SOP](https://mothur.org/wiki/454_SOP). Briefly, De-noising and  
180 chimera analysis conducted with the AmpliconNoise (Quince et al., 2011) and  
181 UCHIME algorithms were used to reduce sequence errors. Furthermore, quality  
182 trimming was conducted to remove unwanted sequences shorter than 200 bp and  
183 reads containing ambiguous bases and with homopolymers longer than 8 bases.  
184 Remaining sequences were used to identify unique sequences by aligning with the  
185 SILVA-based bacteria reference alignment. Within unique sequences, the Uchime tool  
186 was applied to remove chimeras. Next, “Chloroplast”, “Mitochondria”, or “unknown”  
187 were identified and removed from the dataset. Subsequently, after calculating the  
188 pairwise distance and generating the distance matrix, a 97% identity threshold was  
189 used to cluster sequences into Operational Taxonomic Units (OTUs) according to the  
190 UCLUST algorithm (Edgar, 2010). For each OTU, the SILVA database was applied to  
191 annotate taxonomic information.

192

## 193 **2.6. Data availability**

194 Sequencing data are available in the NCBI SRA data repository under the project No.  
195 PRJNA679995.

196

## 197 **2.7. Network construction and analysis**

198 In order to determine the effects of different stand ages on microbiome associations in

199 soils, underlying co-occurring bacterial taxa were depicted through co-occurrence  
200 network analysis. We divided all soil samples from all tea stands into four groups  
201 according to their land use types and stand ages: (1) Forest (F); (2) 3-20 year-old  
202 (Y3-20); (3) 40-50 year-old (Y40-50); and (4) 90 year-old (Y90). In order to reduce  
203 the complexity of the network, a Spearman's correlation between two families was  
204 considered statistically robust if the Spearman's correlation coefficient ( $r$ ) was  $>0.8$   
205 and the  $p$ -value was  $<0.01$  (Barberan et al., 2012). Meanwhile, a multiple testing  
206 correction using the Benjaminie Hochberg (FDR) method was applied to adjust the  $p$   
207 values and reduce the chance of obtaining false-positive results (Benjamini and  
208 Hochberg, 1995). All robust correlations identified from pairwise comparison of  
209 family abundance form a correlation network in which the node represented bacterial  
210 family taxa and the edge represented a strong and significant correlation between the  
211 nodes. In addititon, we also generated sub-networks for each soil sample from  
212 meta-community networks by preserving OTUs presented in each tea stand with the  
213 subgraph function in igraph packages (Ma et al., 2016). To describe the complex  
214 pattern of interrelationship between bacterial taxa, a set of topological characteristics  
215 (number of nodes and edges, average path length, network diameter, average degree,  
216 graph density, clustering coefficient, and modularity) was determined using psych  
217 (Revelle, 2017), vegan (Oksanen et al., 2010) and igraph (Csardi and Nepusz, 2006)  
218 packages in R environment (Version No.: 3.60). Networks were visualized using the  
219 interactive platform Gephi (Bastian et al., 2009). In addition, 10,000 Erdos-Reyni (ER)  
220 random networks were generated to compare with the topology of real network with a

221 random graph which connects each pair of nodes with any probability (Erdős and  
222 Rényi, 1960).

223

## 224 **2.8. Statistical analysis**

225 All statistical analyses were performed in R environment (Version No.: 3.60). To  
226 compare differences in soil physicochemical properties and alpha diversity of soil  
227 bacterial community between different stand ages, a repeated measures ANOVA,  
228 followed by multiple pairwise comparison using Tukey's test at  $\alpha = 0.05$  was  
229 performed by ggpubr package. Linear discriminant analysis effect size (LEfSe) was  
230 performed to elaborate potential bacterial biomarkers (from phylum to genus) within  
231 soil microbiomes that specifically enrich different stand ages of tea plantations, based  
232 on  $p < 0.05$  and a LDA score  $> 2.0$  (Segata et al., 2011). Permutation multivariate  
233 analysis of variance (PERMANOVA) was employed to assess the effects of stand  
234 ages and sites on soil bacterial community using Adonis function of vegan package  
235 (Bell et al., 2014). Redundancy analysis (RDA) was conducted to identify soil  
236 physicochemical properties with significant impact on soil bacterial communities  
237 across different stand ages of tea plantations. Parameters that significantly explained  
238 variation in bacterial community were identified using forward selection (ordistep  
239 function of vegan package) with P value  $< 0.05$ . FAPROTAX (Functional Annotation  
240 of Prokaryotic Taxa) was applied to predict the microbial ecological function profiles  
241 by using the trans\_func class of microeco package (Louca et al., 2016; Liu et al.,  
242 2021)). Non-metric multidimensional scaling (NMDS) analysis based on Bray-Curtis

243 distances was used to evaluate the composition changes in microbial function groups  
244 between different sites and stand ages.

245 Maps of sampling sites were generated using GenGIS and soil physicochemical  
246 properties were ordinated by principal component analysis (PCA). The  $\alpha$  – diversity  
247 (richness, evenness, and diversity) of soil bacterial communities was estimated based  
248 on OTUs. All indices were calculated using Vegan package in R environment. To  
249 assess changes in soil bacterial community structures among different tea  
250 managements and stand ages, principal coordinates analysis (PCoA) was used to  
251 calculate the gradient in compositional changes of bacterial microbial community  
252 (based on Bray-Curtis distances). The Spearman’s correlation analysis between the  
253 Euclidean distances of standardized sub-network topological parameters was applied  
254 to explore the effects of soil properties and stand ages on sub-network topological  
255 features. Soil properties (except for pH) were normalized before the correlation  
256 analysis.

257

### 258 **3. Results**

#### 259 ***3.1. Soil physicochemical properties***

260 Soil pH and 10 other soil properties (TOC, TON, C/N, MBC, MBN, AP, Exch.K,  
261 Exch. Ca, Exch. Mg and Exch. Na) were listed in Table 1. Based on detected soil  
262 properties, PCA showed that soil samples from the TRI site feature significant  
263 environmental heterogeneities across different stand ages (Fig. 1A) The content of  
264 TOC and TON increased along with the stand ages across the three sampling sites

265 (Table 1), and the correlation analysis indicated that alongside the increased stand age  
266 of tea plantations, TOC and MBN in soil increased significantly ( $p < 0.01$ ) (Fig. 1B  
267 and C). However, no consecutive changes along with increased stand age were  
268 recorded for other soil properties (e.g. MBC, AP, and Exch. K) (Table 1).

269

### 270 ***3.2. The bacterial component at different phylogenic level***

271 Sequencing the amplicon libraries resulted in a total of 341,915 raw reads prior to  
272 quality checking and assigning reads to their respective sample. Average read length  
273 ( $\pm$  standard deviation) of reads before processing was  $405 \pm 96$  bp. After quality  
274 trimming and assigning reads to different samples, 204,723 high quality reads  
275 remained in the dataset with an average length of  $207 \pm 4$  bp.

276 The dominant bacterial phyla across all samples were Proteobacteria, Actinobacteria,  
277 Acidobacteria, Chloroflexi, and Firmicutes, while on average 15% of the reads could  
278 not be classified (Fig. 2A). To detect soil bacteria taxa that were significantly affected  
279 by tea stand age and location, the LEfSe analysis based on OTUs was applied to  
280 compare the differences. In general, the change trend of bacterial taxa varied from  
281 sites. LEfSe analysis revealed that 16 biomarkers affiliating with three phyla  
282 increased significantly ( $p < 0.05$ , LDA  $> 2.0$ ) at the 90-year-old tea plantation, while  
283 13 biomarkers within four phyla decreased significantly at the 10-year-old tea  
284 plantation at the TRI site. Moreover, LEfSe analysis demonstrated that few bacterial  
285 taxa increased with years of tea planting in JL and HZ sites compared to with forest  
286 soil (F).

287

### 288 ***3.3. Bacterial community diversity and structure***

289 The bacterial richness, or alpha diversity, varied widely across different sites (Fig. 3A).

290 Soil bacterial richness did not change significantly at different stand ages across all

291 sites except at the HZ site that saw a significantly higher richness in F than that in tea

292 plantations. Further Spearman's correlation analysis revealed that soil bacterial

293 richness was significantly correlated with pH ( $R^2 = 0.71$ ,  $p < 0.001$ ) and

294 negative-correlated with TOC ( $R^2 = -0.53$ ,  $p < 0.001$ ) in tea plantations (Fig. 3B and

295 3C, respectively).

296 To explore how changes in microbiome structure and composition correlated with

297 sampling sites and stand age, we computed the between-sample diversity ( $\beta$ -diversity)

298 using Bray-Curtis distance. Axis 1 and axis 2 explained 57% and 11.9% of the total

299 variation in bacterial community structure, respectively Principal coordinate analysis

300 (PCoA) of bacteria community structure revealed in Fig. 3D that soil samples from

301 different sites with different stand ages were generally clustered separately.

302

### 303 ***3.5. Soil bacterial functions***

304 A total of 22 functional sub-categories (relative abundance  $> 1\%$ ) within 5 major

305 categories "Energy source", "C-cycle", "N-cycle", "S-cycle" and "Others" were

306 identified and linked to the microbial communities across different tea stand ages and

307 sites (Fig. 4A). No consecutive change of these functional sub-categories was

308 observed alongside with the increasing tea stand years in all three sites. Nevertheless,

309 the results in Fig. 4A showed that in TRI site, longer stand year of tea plantation soils  
310 had a higher relative abundance of chemoheterotrophy, photoheterotrophy,  
311 fermentation, cellulolysis, chitinolysis, nitrate reduction, nitrate respiration, nitrogen  
312 fixation and aerobic ammonia oxidation. In addition, in JL site, the relative abundance  
313 of dark hydrogen oxidation increased with the stand ages of tea plantation. When  
314 converting forest to tea plantation, in HZ site, the relative abundance of most C-cycle  
315 functions decreased. Non-metric multidimensional scaling (NMDS, based on  
316 Bray-Curtis distance) plot of all the 22 sub-categories showed the separate clusters of  
317 functional categories between TRI and other two sites soils (Fig.S2A). In TRI and JL  
318 sites, the clusters from different tea stand soils separated from each other, suggesting  
319 that there were significant differences in the function of soil microbial communities  
320 between different tea stand ages (Fig. S2B).

321 Spearman rank-order correlations detected the significant correlations ( $p < 0.05$ )  
322 between dominant microbial classes (the top 15 most abundant classes) and functional  
323 categories, suggesting that most microbial classes possessed the functions of  
324 respiration of sulfur compounds, and sulfur respiration (Fig. 4B). Additionally, the  
325 classes of Ktedonobacteria, Gammaproteobacteria and Clostridia were significantly  
326 correlated with the functions of anaerobic chemoheterotrophy, aerobic  
327 chemoheterotrophy and fermentation ( $p < 0.05$ ). For N-cycle category, the classes of  
328 Actinobacteria, Sphingobacteria, Chthonomonadetes showed the significant  
329 correlations with different sub-categories (Fig. 4B).

### 330 ***3.6. Co-occurrence network analysis of soil bacterial community***

331 For co-occurrence network analysis, we divided all samples into four groups: (1)  
332 Forest (F); (2) 10-20 year-old (Y10-20); (3) 40-50 year-old (Y40-50); and (4) 90  
333 year-old (Y90). Subsequently, four networks (F, Y3-20, Y40-50, Y90) were  
334 constructed to test the effect of stand age on soil bacterial communities' association.  
335 Overall, nodes in all networks were assigned to 15 bacteria phyla and three  
336 unclassified groups. Co-occurrence networks were markedly different among different  
337 stand ages (Fig. 5A). Most links were derived from the phyla of Proteobacteria,  
338 Actinobacteria, Acidobacteria, Firmicutes and Bacteroidetes across the 4 network we  
339 constructed (Fig.5B). However, the proportion of each phyla varied with different  
340 networks. In the F network, three phyla (Proteobacteria, Actinobacteria, and  
341 Acidobacteria) accounted for over 75% of the total links, but this proportion  
342 decreased in other tea stand networks (Fig. 5B). We then investigated the correlations  
343 between key topological parameters of the subnetworks and stand ages by Spearman's  
344 correlation analysis. Average path length (APL) and centralization betweenness  
345 positively and significantly correlated with stand age ( $p < 0.05$ ), suggesting that the  
346 importance of individual bacterial community groups became more uniform as stand  
347 age increased. However, the number of edges and nodes showed no significant  
348 correlation with stand ages (Fig. 5C). Further Spearman's correlation analysis between  
349 topological parameters and soil physicochemical properties revealed that soil C, N  
350 and P were all significantly correlated with some key parameters of subnetworks (e.g.  
351 APL, diameter and centralization betweenness) (Fig. 5D). When comparing the  
352 network parameters we calculated in Fig. 5E between the four co-occurrence



353 networks, the result showed that the number of positive edges was much higher than  
354 that of the negative edges across the soils from all stand ages as well as that of forest  
355 soil. Furthermore, values relating to APL, clustering coefficient, and numbers of  
356 clusters in those empirical networks of various tea plantations and forest were higher  
357 than those of their respective, identically sized Erdose-Reyni random networks. This  
358 indicates that the empirical networks had significant “small-world” modularity and  
359 hierarchy of their topological properties (Fig. 5E). Further structural analysis showed  
360 that the clustering coefficient and edge numbers of the networks increased along with  
361 stand ages (Fig. 5E), indicating that the increased tea plantation stand age made soil  
362 bacterial community associations more complex and tightened. In addition, compared  
363 with F soil, all soil bacterial communities of tea plantations had a relatively high APL  
364 value (Fig. 5E).

365

#### 366 ***3.4. Relationship of soil properties with the structure, function and co-occurrence*** 367 ***partten of soil bacterial communities***

368 Redundancy analysis (RDA) was applied to study the effects of soil properties on the  
369 structure of soil bacterial communities based on OTU abundance. The ordination  
370 diagram showed that bacterial community change was significantly correlated with  
371 soil variables: TOC, TON, MBC, pH, and AP&K ( $p < 0.05$ , Monte Carlo test) (Fig.  
372 6A). The first two axes of RDA can explain 41.5% and 12.5% of the total variation. In  
373 addition, both sampling sites and stand age can significantly affect soil bacterial  
374 communities (PERMANOVA test,  $p < 0.01$ ), and stand age ( $R^2 = 0.569$ ) outcompeted

375 sampling sites ( $R^2 = 0.377$ ; Fig. 6B) for controlling bacterial community composition.  
376 In addition, to identify the edaphic drivers of soil microbial communities in tea  
377 plantation, we correlated the composition of taxonomic and functional communities  
378 and topological parameters with soil properties. The mantel correlations showed that  
379 soil C and N as well as AP were the strongest correlates of both taxonomic and  
380 functional composition (Fig. 6C). At the same time, TOC, TON, MBC and MBN were  
381 also strongly self-correlated. For the co-occurrence network, soil Exch. K content was  
382 the significant correlate ( $p < 0.05$ ) (Fig. 6C).

383

#### 384 **4. Discussion**

385 Soil microbial communities are of particular relevance in tea cultivation, since soil  
386 microbiota demonstrate reservoirs of microorganisms colonizing tea plantations, and  
387 contributing to improved yield and tea quality (Mortimer et al., 2015). To characterize  
388 the effects of long-term monoculture and other environment factors like location and  
389 soil properties on soil bacterial communities, we investigated soil bacterial  
390 communities of tea plantation at different stand ages and associated forests across  
391 three different sites in eastern China.

392

##### 393 ***4.1. Effect of soil properties on shaping soil bacterial communities***

394 Our study revealed that soil TOC and MBN in tea plantation are significantly  
395 positively correlated with stand age (Fig. 1B&C). This is in line with previous studies  
396 reporting the plantation age as a critical factor affecting SOC and N dynamics during

397 land use change, in particular on tea plantations (Pansombat et al., 1997; Wang et al.,  
398 2016). This demonstrates that long-term tea plantations result in a significant  
399 accumulation of organic C and N. The increase in the amount of soil micro-aggregates  
400 in long-term tea plantations can be a reason for such an increase in TOC and MBN, as  
401 micro-aggregates are the most predominant pools of SOC and other nutrients (Wang  
402 et al., 2016). In addition, the application of long-term organic and mineral fertilizers  
403 into tea plantations could also result in the accumulation of organic C and N in the  
404 soil.

405 Soil pH is an important factor affecting soil bacterial communities in regional and  
406 global scales, which has been confirmed in other ecosystems (Delgado-Baquerizo et  
407 al., 2018). For instance, Zhou et al. (2017) found that richness of soil bacteria was  
408 significantly negatively correlated with soil pH in rubber plantations (pH: 3.94-4.41)  
409 but in an oil-contaminated soil, pH was positively associated with bacterial diversity  
410 (pH: 7.49 - 9.20) (Jiao et al., 2016). Our research has shown that in an acidic tea  
411 plantation, soil pH was strongly positively correlated with the alpha diversity of soil  
412 bacterial communities (Fig. 3B). This finding is in line with previous studies  
413 (Griffiths et al., 2011), which have illustrated that soil pH is positively correlated with  
414 bacterial alpha diversity, and alpha diversity of bacterial communities was highest at a  
415 near-neutral pH.

416 In addition to the importance of some commonly accepted variables like C, N, and  
417 soil pH in shaping soil microbial communities, our study also supports the finding  
418 that soil base cations like Ca and K are important in shaping the composition and

419 co-occurrence network of the bacterial communities of tea plantation (Fig.6). These  
420 base cations act as nutrients or structural components of the cells of living  
421 microorganisms (Tripler et al., 2006). When considering the drivers of soil bacterial  
422 communities, the availability of Ca and K mostly impact the bacteria involved in the  
423 dissolution of soil minerals (e.g., mineral-weathering bacteria) (Puente et al., 2004).  
424 The effects of Ca and K on structure of soil bacterial communities have been reported  
425 in forest soils (Uroz et al., 2011) and agricultural soils (Schmidt et al., 2019). Our  
426 study reaffirmed the importance of these base cations in shaping bacterial community  
427 structures and intra-taxa associations in tea plantation soils.

428

#### 429 ***4.2. Effects of tea plantation stand age on microbial communities***

430 The alpha diversity of soil bacterial communities remained stable during long-term  
431 tea plantations (Fig. 3A). This sort of stability was also observed in a 20 years tea  
432 plantation (Li et al., 2016). Zhao et al. (2012) proposed that in a monoculture  
433 cropping system like tea plantation, rhizosphere effects are the critical factor that  
434 determine bacterial community diversity, and the toxicity and accumulation of  
435 antimicrobial substances due to long-term cropping as well as the specific acidic soil  
436 environment which may suppress the development of bacterial populations. One or  
437 combination of these factors could explain the stability of alpha diversity observed in  
438 our study. Furthermore, soil properties like pH are known to intimately determine  
439 bacterial diversity and community composition (Bissett et al., 2011). As shown in  
440 Table 1, soil pH did not show a significant response to long-term tea plantations at

441 each site, which could also result in the insignificant change of the alpha diversity. In  
442 addition, despite the acidic soil environment, the increasing TOC and MBN with  
443 successive tea planting may also contribute to the stability of the alpha diversity, as  
444 soil organic matter and nutrients have a profound effect on microbial diversity  
445 (Montecchia et al., 2015). Previous studies (Jangid et al., 2008; Lee-Cruz et al., 2013)  
446 have shown that the alpha diversity of soil bacterial communities can be declined by  
447 the conversion of forests to long-term agriculture management. In contrast, our  
448 finding at the JL site did not agree with this conclusion, and we suggest here that after  
449 forests were converted to monoculture agricultural system, it does not necessarily  
450 mean that the bacterial community's diversity is reduced or lost. In addition, our study  
451 also revealed that some key soil functions related to C and N cycles shifted after  
452 converting forest to tea plantation (Fig. 4A). This disagreement is mostly because the  
453 effect of cultivation on alpha diversity and soil functions strongly depends on the  
454 nature of the soil and cultivation type (Coller et al., 2019). Since the quality of SOM  
455 was already low at pH 4.3 under forest, 0.4 unit decrease in pH over long-time  
456 plantation didn't make a considerable difference in SOM quality. Therefore, the  
457 microbial response remained comparable between tea plantations and forests.

458 Considering the between-samples variability, both PERMANOVA and PCoA analyses  
459 indicated that sampling location and stand age can significantly affect the beta  
460 diversity of soil bacterial communities ( $p < 0.01$ ), and stand age ( $R^2 = 0.569$ ) more  
461 significantly affected the beta diversity than sampling location ( $R^2 = 0.377$ ; Table 2).  
462 It has been previously suggested that geographical origin is the dominant factor in

463 determining the structure of soil bacterial communities in vineyards (Coller et al.,  
464 2019), which is partially consistent with our finding in tea plantation soils.  
465 Importantly, we found that stand age could indeed shape the structure of bacterial  
466 communities in tea plantation soil. Because this change in microbial community  
467 structure was mostly induced by C and N increases with tea stand age, the bacterial  
468 community structure is mainly affected by environmental variables (Jiao et al., 2016).  
469 In general, our study confirmed that environmental variability caused by long-term  
470 monoculture and spatial variability (tea plantation sites) determined the structure of  
471 bacterial communities in tea plantation soil.

472 *4.3. Interactions among soil bacteria taxa were strengthened by long-term tea*  
473 *monoculture*

474 Referring to the studied bacterial communities, the 16S rRNA sequencing indicated  
475 that Proteobacteria, Actinobacteria, and Acidobacteria were the dominant taxa across  
476 all samples in tea plantation soils. This finding is consistent with previous Chinese tea  
477 plantation soil studies (Li et al., 2016). Co-occurrence network analysis across all  
478 stand ages also revealed that most of the nodes belonged to these three phyla. In  
479 addition, we found that the tea plantation networks were nonrandom and typically  
480 matched the topological features of a small-world and intrinsic modular architecture  
481 (Barberan et al., 2012). This typical “small-world” characteristic in tea plantation soils  
482 made the networks more strengthened than random associations (Watts and Strogatz,  
483 1998).

484 Interestingly, to our knowledge, this study is among the first reporting that long-term

485 tea monoculture tightened soil microbial associations. One possible explanation is that  
486 changes of some taxa were sensitive to C and N increase induced by tea planting. The  
487 LEfSe analysis detected several carbon- or nitrogen-susceptible taxa in the  
488 Rhizobiales, Xanthomonadales, and Burkholderiales, which have previously been  
489 reported as keystone taxa in agricultural ecosystems linked to C and N metabolism in  
490 soils (Li et al., 2015). In our study, the function prediction also revealed that some  
491 bacterial taxa like Actinobacteria, Chthonomonadetes were correlated with the key  
492 processes in C and N cycles (Fig. 4B). Another explanation is that greater nutrient  
493 availability like C and N in the soil could subsequently strengthen microbial  
494 interactions in order to enhance the efficiency of resource turnover that benefits tea  
495 growth (Shi et al., 2016; Zhao et al., 2019). Lastly, according to the topological  
496 characteristic analysis, long-term tea monoculture and agropedogenesis reduced  
497 betweenness centralization and the links of key bacterial taxa in the networks, which  
498 could partially contribute to the tightening of soil bacterial associations in tea  
499 plantation (Kuzyakov and Zamanian, 2019).

500 In order to display the chronosequence development of networks with stand ages, we  
501 merged tea stands soils from different sampling sites into one stand age group.  
502 Despite that, we acknowledge that this merge could obscure the effects of  
503 geographical parameters on network construction, but nonetheless this study is the  
504 first to demonstrate that long-term monoculture has tightened soil microbiome  
505 network associations in tea plantations.

506

507 **5. Conclusions**

508 Through comparison of three independent sites, we found that long-term tea  
509 monoculture led to significant increases in TOC and MBN. This C and N availability  
510 improvement in tea plantation soils could contribute to tea yield growth and be of  
511 greater benefit to tea monocultural systems. The analysis of 16S rRNA genes of  
512 bacterial communities revealed that the structures of soil bacterial communities were  
513 significantly changed by the stand age of tea plantations, sampling locations, and  
514 land-use conversion. Stand age outcompeted sampling locations for controlling the  
515 composition of bacterial communities. Interestingly, this study is the first of its kind to  
516 report that long-term tea monoculture tightened soil microbiome associations through  
517 co-occurrence network analysis.

518

519 **Conflicts of interest**

520 The authors declare they have no conflict of interest.

521 **Acknowledgements**

522 This research was supported by the National Key R&D Program of China  
523 (2017YFE0107500) and the Research Fund for International Young Scientists of  
524 National Natural Science Foundation of China to K.Z. (Grant number: 42050410320).  
525 Heng Gui would like to thank the support from the National Natural Science  
526 Foundation of China (NSFC Grant 32001296) and Yunnan Fundamental Research  
527 Projects (grant NO. 2019FB063).

528





530 **Figure captions**

531

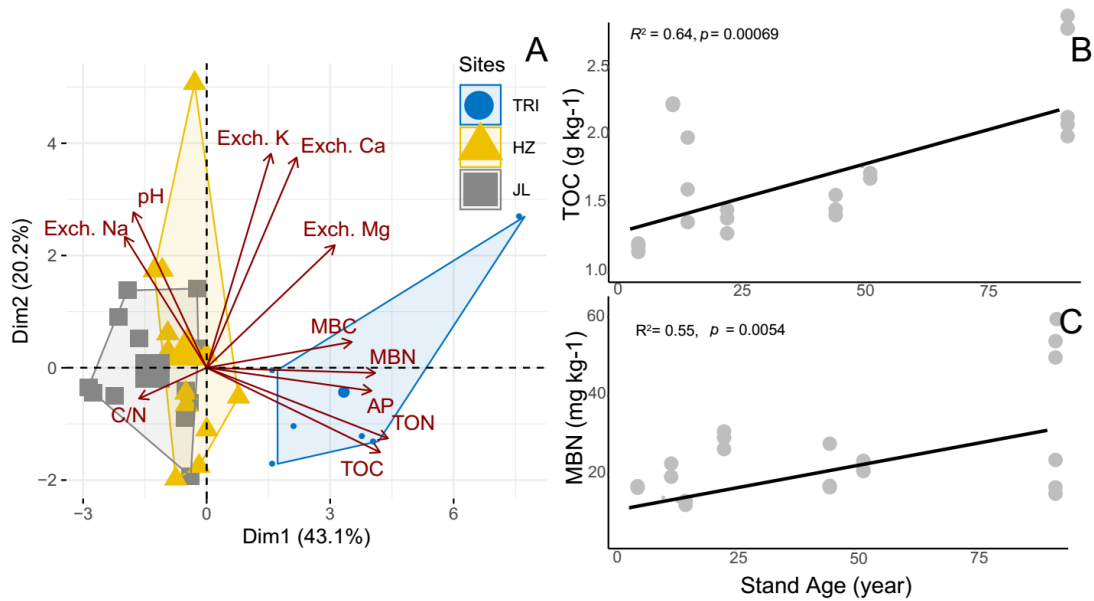

532

533 Fig. 1 (A) Principal component analysis (PCA) based on soil physicochemical  
534 properties as variables. The sampling tea stands from same site were circled and  
535 grouped as same color. (B) and (C) significant linear regression ( $p < 0.01$ ) between  
536 total carbon (TOC)/ microbial biological nitrogen (MBN) in the soil and the stand age  
537 across all tea plantations.

538

539

540

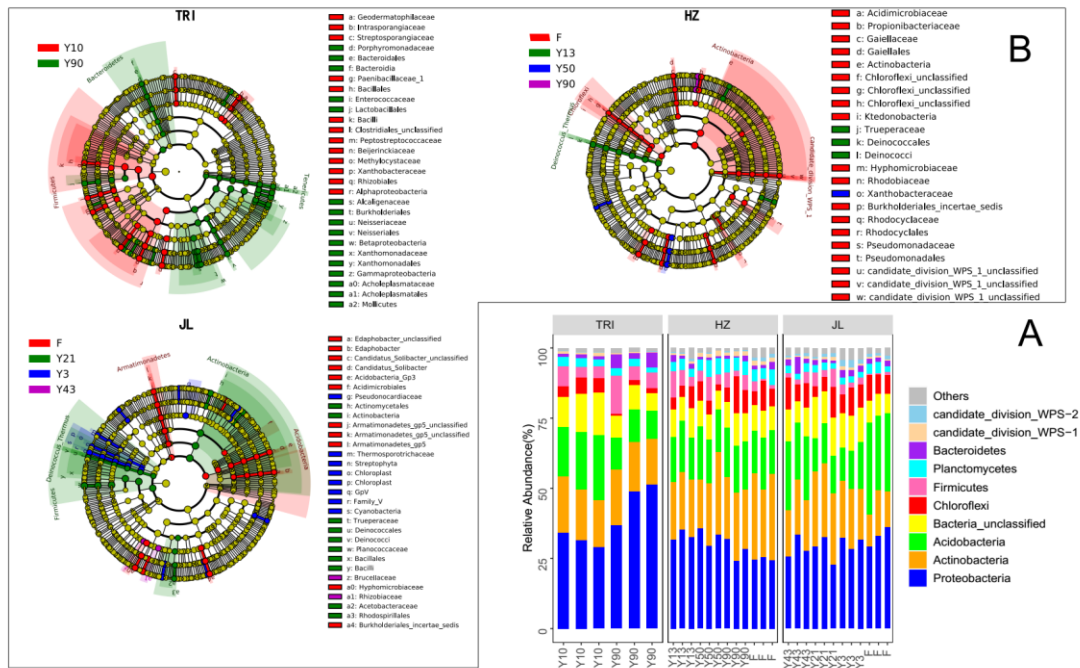

541

542 Fig. 2. (A) Taxonomic structure of the soil bacterial microbiota at the phylum level.

543 Only the 10 phylum with the highest mean relative abundance were shown, while the

544 other phylum groups were grouped into “others”. (B) The effects of varying stand

545 ages on the relative abundance of soil bacterial lineages were assessed through LDA

546 Effect Size (LEfSe) with an absolute logarithmic LDA score threshold of 2.0 at three

547 sampling sites (TRI, HZ and JL respectively). There are six circular rings in the

548 cladogram, each circular ring deposit all taxa within a taxonomic level; the circular

549 ring from inside to outside represents supergroup, phylum, class, order, family, and

550 genus respectively

551

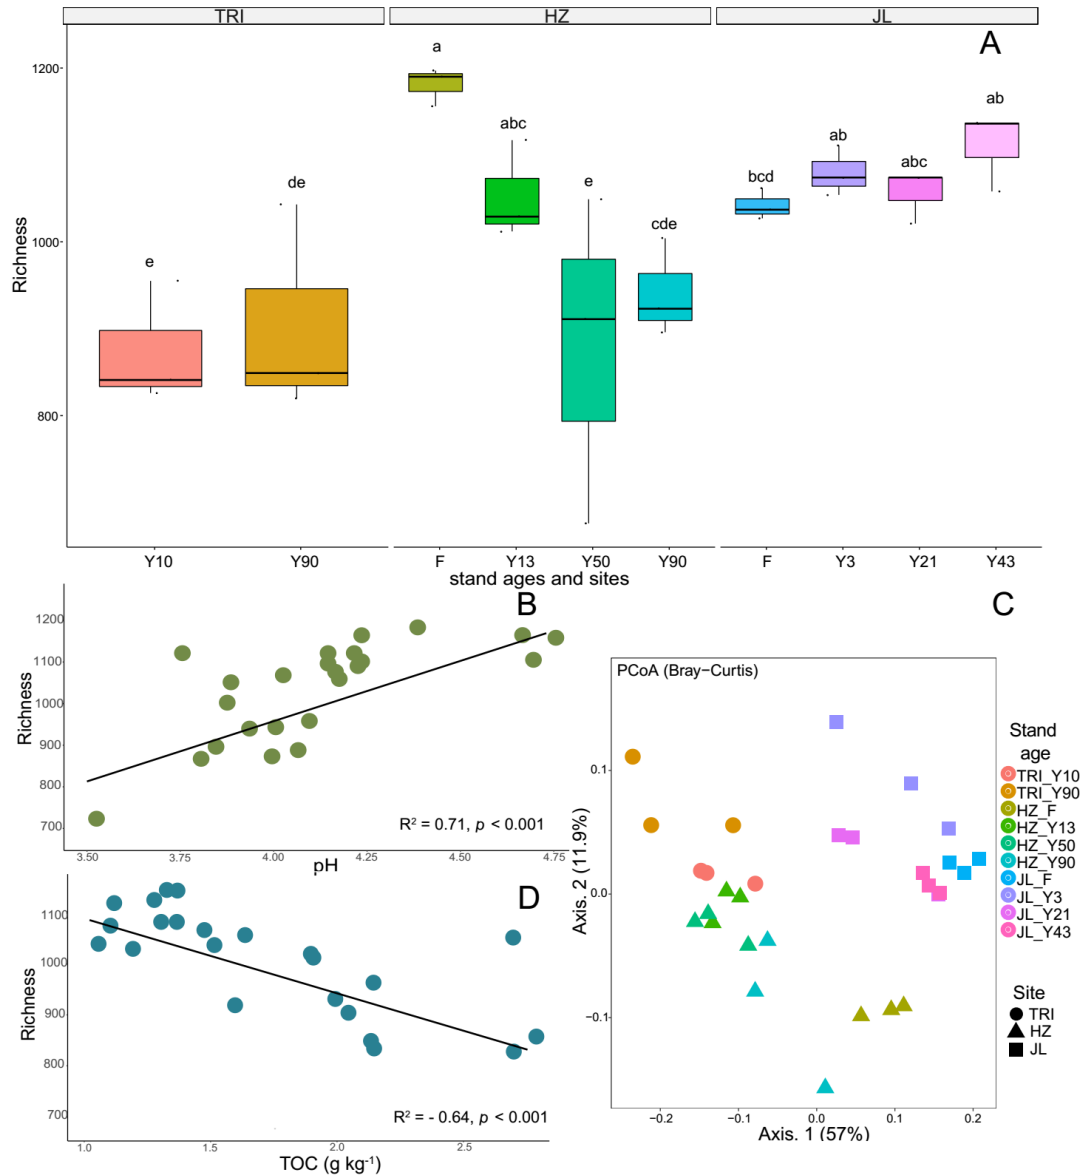

552

553 Fig. 3. (A) The richness of soil bacterial community of tea plantation at varying stand  
554 ages and different sampling sites. (B) and (C) significant linear regression ( $p < 0.001$ )  
555 relationships between total carbon (TOC)/ soil pH in the soil and the richness of soil  
556 bacterial communities across all tea stands. (D) Principal coordinate analysis (based  
557 on Bray-Curtis distances) of soil bacterial community composition across varying  
558 stand ages and different sampling sites. The samples separated by sites (TRI, HZ, and  
559 JL, respectively; represented by different shape) and stand ages (F (adjacent forest);

560 represented by different colors).

561

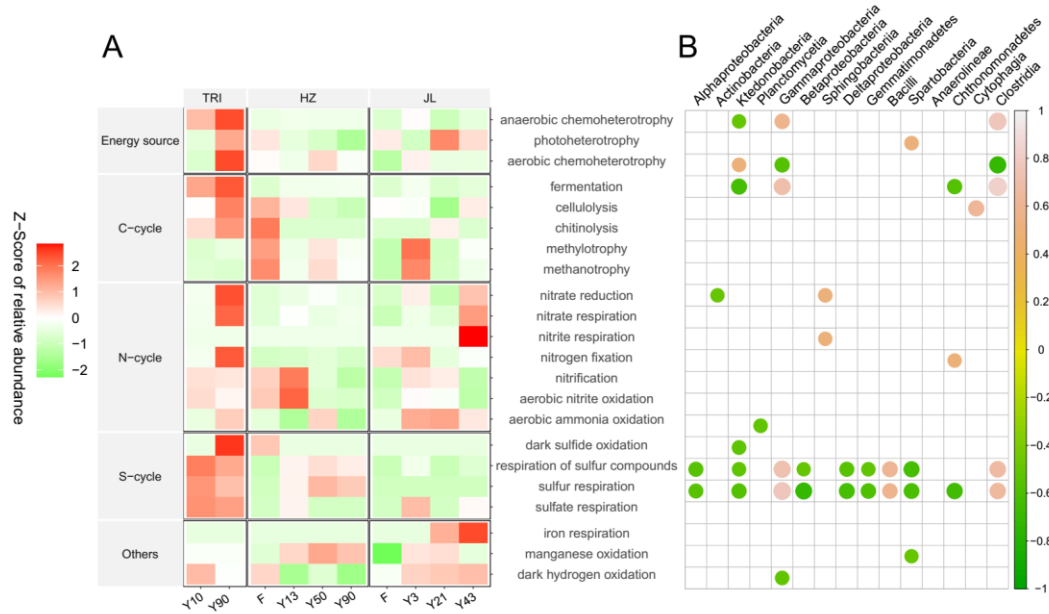

562

563 Fig. 4 Function predictions of microbial communities in tea plantation soils across

564 varying stand ages and different sampling sites by FAPROTAX. The relative

565 abundance of each functional categories is normalized and represented by Z-score. (A)

566 Comparison of dominant functional categories; (B) The Spearman's correlation

567 between 15 most abundant microbial classes and predicted functional categories.

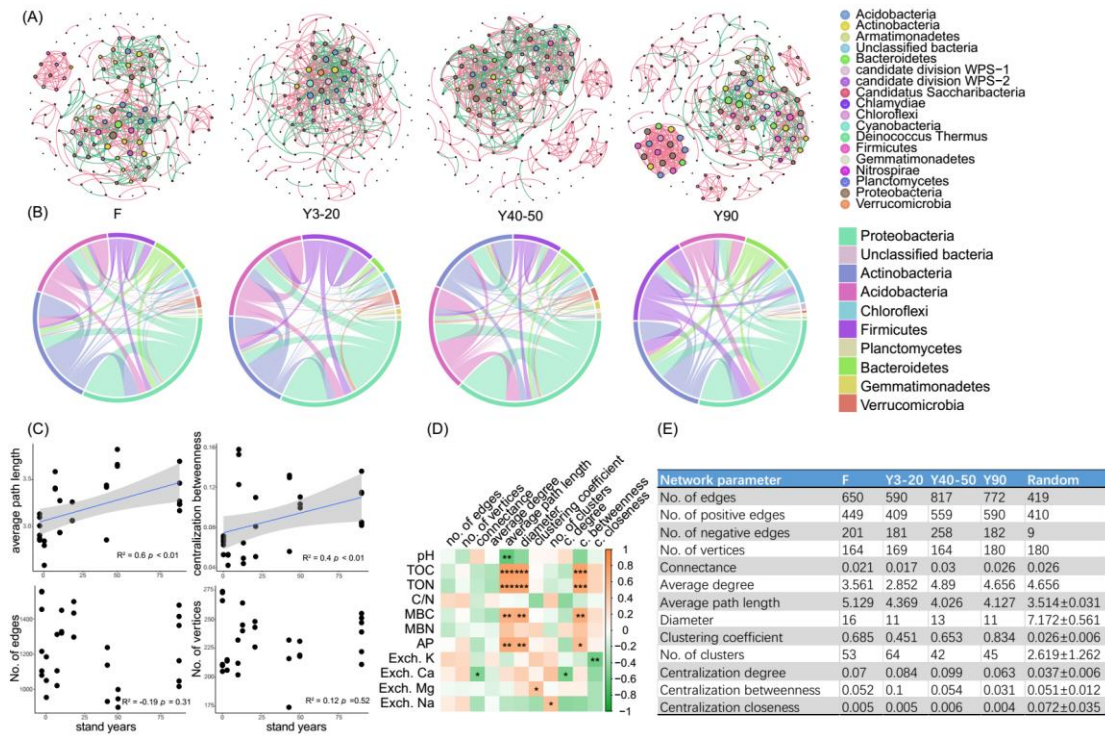

568

569 Fig. 5 (A) The co-occurrence networks visualize the effects of varying stand ages of  
570 tea plantations (Y3-20, Y40-50, Y90) and the adjacent forest (F)) on the  
571 co-occurrence pattern between soil bacterial taxa at family level The node size is  
572 proportional to the abundance of taxa, and the nodes represent bacterial taxa at family  
573 level. The edges are colored according to interaction types; positive correlations are  
574 labeled with green and negative correlations are colored in pink. (B) CIRCOS plots  
575 showing the distribution of links among the top 10 interacting phyla in networks  
576 Y3-20, Y40-50, Y90 and F. (C) Linear regression relationships between tea stand  
577 ages and key topological parameters of all subnetworks (average path length,  
578 centralization betweenness, No. of edges and No. of vertices). (D) Spearman's  
579 correlations between soil physicochemical properties and topological parameters in all  
580 subnetworks. Significant correlations are marked by \* ( $p < 0.05$ ), \*\* ( $p < 0.01$ ), and  
581 \*\*\* ( $p < 0.001$ ). (E) Topological parameters of the networks Y3-20, Y40-50, Y90 and

582 F.

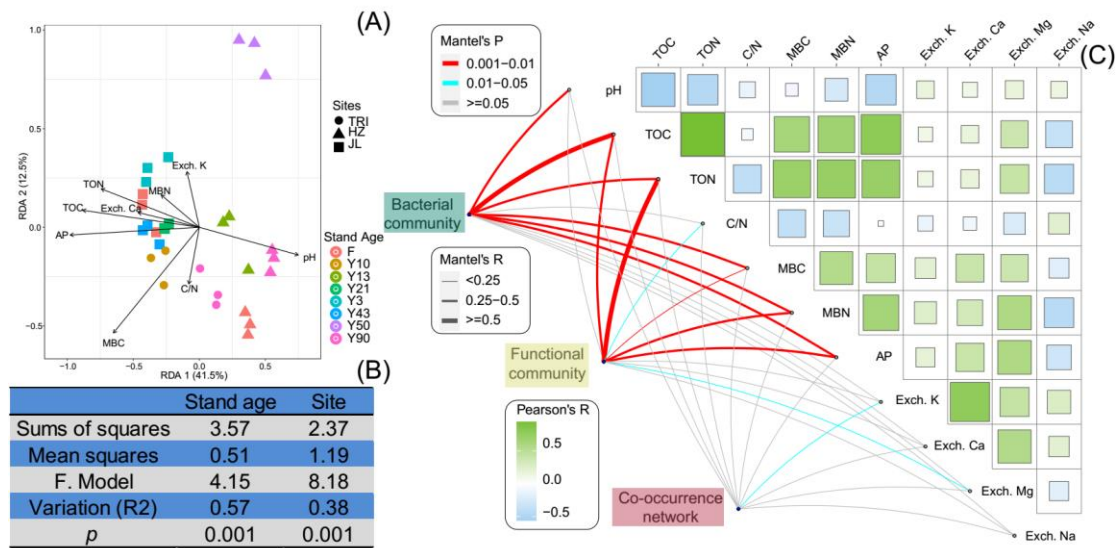

583

584 Fig. 6. (A) Redundancy analysis (RDA) of the relationships between soil  
 585 physicochemical properties and bacterial communities under different sites and stand  
 586 ages. The samples separated by sites (TRI, HZ, and JL, respectively; represented by  
 587 different shape) and stand ages (including the adjacent forest (F); represented by  
 588 different colors). (B) The effects of stand age and sampling site on soil bacterial  
 589 communities of tea plantations based on permutation multivariate analysis of variance  
 590 (PERMANOVA). (C) Pairwise comparisons of soil physicochemical properties are  
 591 shown, with a color gradient denoting Pearson's correlation coefficients. Bacterial  
 592 (based on the relative abundance of OTUs) and functional (based on the relative  
 593 abundance of functional categories predicted by FAPROTAX) community  
 594 composition and co-occurrence network (based on the topological parameters of all  
 595 subnetworks) are related to each soil properties by Mantel tests. Edge width  
 596 corresponds to the Mantel's R statistic for the corresponding distance correlations, and  
 597 edge color denotes the statistical significance based on 9,999 permutations.

598 Table 1. Soil physicochemical properties in tea plantations under different sites and stand ages

| Site<br>Stand age               | TRI             |                | HZ             |                 |                |                | JL             |               |               |               |
|---------------------------------|-----------------|----------------|----------------|-----------------|----------------|----------------|----------------|---------------|---------------|---------------|
|                                 | 10              | 90             | 0 <sup>#</sup> | 13              | 50             | 90             | 0 <sup>#</sup> | 3             | 21            | 43            |
| pH (H <sub>2</sub> O, 1:1)      | 3.95±0.1b       | 3.93±0.23b     | 4.32±0.05ab    | 4.17±0.04ab     | 3.9±0.34b      | 3.92±0.06b     | 4.35±0.11ab    | 4.38±0.31ab   | 3.95±0.2b     | 4.56±0.17a    |
| TOC (g kg <sup>-1</sup> )       | 2.11±0.01b      | 2.69±0.05a     | 1.11±0.09f     | 1.53±0.31cd     | 1.64±0.11c     | 1.95±0.07b     | 1.05±0.06f     | 1.06±0.03f    | 1.25±0.09ef   | 1.35±0.08de   |
| TON (g kg <sup>-1</sup> )       | 0.22±0.03b      | 0.26±0.01a     | 0.1±0.01ef     | 0.12±0.02cde    | 0.14±0.01cd    | 0.15±0.02c     | 0.08±0.01f     | 0.11±0.01def  | 0.12±0.01cde  | 0.14±0.01cde  |
| C/N                             | 9.9±1.35b       | 10.46±0.21b    | 11.07±0.29ab   | 12.49±0.59ab    | 11.71±1.16ab   | 13.03±1.7a     | 13.41±1.53a    | 10.02±0.53b   | 10.18±0.63b   | 10.06±1b      |
| MBC (mg kg <sup>-1</sup> )      | 493.1±51.77b    | 650.13±21.49a  | 431.67±33.75b  | 246.75±54.75de  | 350.67±33.47c  | 277.82±38.64cd | 86.13±17.46f   | 66.68±16.65f  | 175.42±60.31e | 597.72±89.15a |
| MBN (mg kg <sup>-1</sup> )      | 15.38±2.46bc    | 52.2±9.06a     | 12.32±0.67c    | 9.54±2.52c      | 17.12±1.46bc   | 13.85±4.56c    | 11.76±3.45c    | 11.63±0.93c   | 24.23±2.28b   | 15.89±6.28bc  |
| AP (mg kg <sup>-1</sup> )       | 45.25±10.96ab   | 66.89±44.18a   | 7.16±3.28b     | 32.78±2.97ab    | 37.57±6.78ab   | 40.25±1.9ab    | 3.17±2.42b     | 1.73±0.6b     | 22.11±10.16b  | 4.51±1.11b    |
| Exch. K (mg kg <sup>-1</sup> )  | 71.73±11.61ab   | 97.57±16.72ab  | 109.63±42.95a  | 87.88±17.95ab   | 51.09±4.96b    | 70.16±18.35ab  | 61.77±2.64ab   | 83.09±11.07ab | 67.67±8.28ab  | 65.74±12.08ab |
| Exch. Ca (mg kg <sup>-1</sup> ) | 575.63±124.19ab | 1137±1039.23ab | 1531.5±955.34a | 706.37±222.65ab | 419.23±46.02ab | 294.77±120.6b  | 191.57±19.82b  | 341.67±35.2b  | 266.7±141.45b | 320.03±79.09b |
| Exch. Mg (mg kg <sup>-1</sup> ) | 39.88±14.89a    | 72.29±59.78a   | 31.65±4.83a    | 29.54±7.21a     | 21.29±1.8a     | 19.72±8.27a    | 20.06±2.82a    | 39.01±1.98a   | 25.95±3.15a   | 40.26±32.94a  |
| Exch. Na (mg kg <sup>-1</sup> ) | 3.62±0.96b      | 2.91±0.7b      | 8.96±0.77a     | 5.47±0.81ab     | 6.9±1.98ab     | 6.62±1.42ab    | 4.45±1.91b     | 6.99±2.15ab   | 3.15±1.55b    | 4±2.05b       |

# where forest is represented by stand age "0".

599

600

601



602

603

### References:

- 604 Banerjee S, Kirkby CA, Schmutter D, Bissett A, Kirkegaard JA, Richardson AE. Network analysis  
605 reveals functional redundancy and keystone taxa amongst bacterial and fungal communities during  
606 organic matter decomposition in an arable soil. *Soil Biology & Biochemistry* 2016; 97: 188-198.
- 607 Barberán A, Bates ST, Casamayor EO, Fierer N. Using network analysis to explore co-occurrence  
608 patterns in soil microbial communities. *The ISME Journal* 2012; 6: 343-351.
- 609 Bastian M, Heymann S, Jacomy M. Gephi: an open source software for exploring and manipulating  
610 networks. *Proceedings of the International AAAI Conference on Web and Social Media*. 3, 2009.
- 611 Bell TH, Hassan SE, Lauron-Moreau A, Al-Otaibi F, Hijri M, Yergeau E, et al. Linkage between  
612 bacterial and fungal rhizosphere communities in hydrocarbon-contaminated soils is related to plant  
613 phylogeny. *The ISME Journal* 2014; 8: 331-343.
- 614 Benjamini Y, Hochberg Y. Controlling the false discovery rate: a practical and powerful approach to  
615 multiple testing. *Journal of the Royal statistical society: series B (Methodological)* 1995; 57: 289-300.
- 616 Bissett A, Richardson AE, Baker G, Thrall PH. Long-term land use effects on soil microbial  
617 community structure and function. *Applied Soil Ecology* 2011; 51: 66-78.
- 618 Büemann EK, Bongiorno G, Bai Z, Creamer RE, De Deyn G, de Goede R, et al. Soil quality – A  
619 critical review. *Soil Biology & Biochemistry* 2018; 120: 105-125.
- 620 Chen L, Jiang Y, Liang C, Luo Y, Xu Q, Han C, et al. Competitive interaction with keystone taxa  
621 induced negative priming under biochar amendments. *Microbiome* 2019; 7.
- 622 Coller E, Cestaro A, Zanzotti R, Bertoldi D, Pindo M, Larger S, et al. Microbiome of vineyard soils is  
623 shaped by geography and management. *Microbiome* 2019; 7.
- 624 Csardi G, Nepusz T. The igraph software package for complex network research. *InterJournal, complex*  
625 *systems* 2006; 1695: 1-9.
- 626 Da C Jesus E, Marsh TL, Tiedje JM, de S Moreira FM. Changes in land use alter the structure of  
627 bacterial communities in Western Amazon soils. *The ISME Journal* 2009; 3: 1004-1011.
- 628 Decaëns T. Macroecological patterns in soil communities. *Global Ecology and Biogeography* 2010; 19:  
629 287-302.
- 630 Delgado-Baquerizo M, Oliverio AM, Brewer TE, Benavent-González A, Eldridge DJ, Bardgett RD, et  
631 al. A global atlas of the dominant bacteria found in soil. *Science* 2018; 359: 320-325.
- 632 Deng Y, Zhang P, Qin Y, Tu Q, Yang Y, He Z, et al. Network succession reveals the importance of  
633 competition in response to emulsified vegetable oil amendment for uranium bioremediation.  
634 *Environmental Microbiology* 2016; 18: 205-218.
- 635 El Zahar Haichar F, Marol C, Berge O, Rangel-Castro JI, Prosser JI, Balesdent J, et al. Plant host  
636 habitat and root exudates shape soil bacterial community structure. *The ISME Journal* 2008; 2:  
637 1221-1230.
- 638 Erdős P, Rényi A. On the evolution of random graphs. *Publ. Math. Inst. Hung. Acad. Sci* 1960; 5:  
639 17-60
- 640 Fan K, Weisenhorn P, Gilbert JA, Chu H. Wheat rhizosphere harbors a less complex and more stable  
641 microbial co-occurrence pattern than bulk soil. *Soil Biology & Biochemistry* 2018; 125: 251-260.
- 642 Fan L, Han W. Soil respiration after forest conversion to tea gardens: A chronosequence study. *Catena*  
643 2020; 190: 104532.
- 644 Fan L, Yang M, Han W. Soil Respiration under Different Land Uses in Eastern China. *Plos One* 2015;

- 645 10: e0124198.
- 646 Fierer N, Jackson RB. The diversity and biogeography of soil bacterial communities. Proceedings of  
647 the National Academy of Sciences 2006; 103: 626-631.
- 648 Geisseler D, Scow KM. Long-term effects of mineral fertilizers on soil microorganisms – A review.  
649 Soil Biology & Biochemistry 2014; 75: 54-63.
- 650 Girvan MS, Bullimore J, Pretty JN, Osborn AM, Ball AS. Soil type is the primary determinant of the  
651 composition of the total and active bacterial communities in arable soils. Applied and Environmental  
652 Microbiology 2003; 69: 1800-1809.
- 653 Griffiths RI, Thomson BC, James P, Bell T, Bailey M, Whiteley AS. The bacterial biogeography of  
654 British soils. Environmental Microbiology 2011; 13: 1642-1654.
- 655 Han W, Kemmitt SJ, Brookes PC. Soil microbial biomass and activity in Chinese tea gardens of  
656 varying stand age and productivity. Soil Biology & Biochemistry 2007; 39: 1468-1478.
- 657 Jangid K, Williams MA, Franzluebbers AJ, Sanderlin JS, Reeves JH, Jenkins MB, et al. Relative  
658 impacts of land-use, management intensity and fertilization upon soil microbial community structure in  
659 agricultural systems. Soil Biology & Biochemistry 2008; 40: 2843-2853.
- 660 Jiao S, Liu Z, Lin Y, Yang J, Chen W, Wei G. Bacterial communities in oil contaminated soils:  
661 Biogeography and co-occurrence patterns. Soil Biology & Biochemistry 2016; 98: 64-73.
- 662 Kuzyakov Y, Zamanian K. Reviews and syntheses: Agropedogenesis – humankind as the sixth  
663 soil-forming factor and attractors of agricultural soil degradation. Biogeosciences 2019; 16: 4783-4803.
- 664 Lauber CL, Hamady M, Knight R, Fierer N. Pyrosequencing-based assessment of soil pH as a predictor  
665 of soil bacterial community structure at the continental scale. Applied and Environmental Microbiology  
666 2009; 75: 5111-5120.
- 667 Lee-Cruz L, Edwards DP, Tripathi BM, Adams JM. Impact of Logging and Forest Conversion to Oil  
668 Palm Plantations on Soil Bacterial Communities in Borneo. Applied and Environmental Microbiology  
669 2013; 79: 7290-7297.
- 670 Li W, Zheng Z, Li T, Zhang X, Wang Y, Yu H, et al. Effect of tea plantation age on the distribution of  
671 soil organic carbon fractions within water-stable aggregates in the hilly region of Western Sichuan,  
672 China. Catena 2015; 133: 198-205.
- 673 Li YC, Li Z, Li ZW, Jiang YH, Weng BQ, Lin WX. Variations of rhizosphere bacterial communities in  
674 tea (*Camellia sinensis* L.) continuous cropping soil by high-throughput pyrosequencing approach.  
675 Journal of Applied Microbiology 2016; 121: 787-799.
- 676 Liu C, Cui Y, Li X, et al. microeco: an R package for data mining in microbial community ecology[J].  
677 FEMS Microbiology Ecology 2021; 97: fiae255.
- 678 Louca S, Jacques SM, Pires AP, Leal JS, Srivastava DS, Parfrey LW, et al. High taxonomic variability  
679 despite stable functional structure across microbial communities. Nature Ecology & Evolution 2016; 1:  
680 0015.
- 681 Ma B, Wang H, Dsouza M, et al. Geographic patterns of co-occurrence network topological features  
682 for soil microbiota at continental scale in eastern China. The ISME Journal, 2016;10: 1891-1901.
- 683 Ma L, Zhang J, Li Z, Xin X, Guo Z, Wang D, et al. Long-term phosphorus deficiency decreased  
684 bacterial-fungal network complexity and efficiency across three soil types in China as revealed by  
685 network analysis. Applied Soil Ecology 2020; 148: 103506.
- 686 Martiny JBH, Bohannan BJM, Brown JH, Colwell RK, Fuhrman JA, Green JL, et al. Microbial  
687 biogeography: putting microorganisms on the map. Nature Reviews Microbiology 2006; 4: 102-112.
- 688 Montecchia MS, Tosi M, Soria MA, Vogrig JA, Sydorenko O, Correa OS. Pyrosequencing Reveals

689 Changes in Soil Bacterial Communities after Conversion of Yungas Forests to Agriculture. *Plos One*  
690 2015; 10.

691 Mortimer PE, Gui H, Xu J, Zhang C, Barrios E, Hyde KD. Alder trees enhance crop productivity and  
692 soil microbial biomass in tea plantations. *Applied Soil Ecology* 2015; 96: 25-32.

693 Oksanen J, Blanchet FG, Kindt R, Legendre P. *vegan: community ecology package*. R package version  
694 2010; 2.

695 Pansombat K, Kanazawa S, Horiguchi T. Microbial ecology in tea soils .1. Soil properties and  
696 microbial populations. *Soil Science and Plant Nutrition* 1997; 43: 317-327.

697 Puente ME, Bashan Y, Li CY, Lebsky VK. Microbial populations and activities in the rhizoplane of  
698 rock-weathering desert plants. I. Root colonization and weathering of igneous rocks. *Plant Biology*  
699 2004; 6: 629-642.

700 Revelle WR. *psych: Procedures for personality and psychological research* 2017.

701 Rodrigues JLM, Pellizari VH, Mueller R, Baek K, Jesus EDC, Paula FS, et al. Conversion of the  
702 Amazon rainforest to agriculture results in biotic homogenization of soil bacterial communities.  
703 *Proceedings of the National Academy of Sciences* 2013; 110: 988-993.

704 Segata N, Izard J, Waldron L, Gevers D, Miropolsky L, Garrett WS, et al. Metagenomic biomarker  
705 discovery and explanation. *Genome Biology* 2011; 12: 1-18.

706 Schmidt JE, Vannette RL, Igwe A, Blundell R, Casteel CL, Gaudin ACM. Effects of Agricultural  
707 Management on Rhizosphere Microbial Structure and Function in Processing Tomato Plants. *Applied*  
708 *and Environmental Microbiology* 2019; 85.

709 Shi S, Nuccio EE, Shi ZJ, He Z, Zhou J, Firestone MK. The interconnected rhizosphere: High network  
710 complexity dominates rhizosphere assemblages. *Ecology Letters* 2016; 19: 926-936.

711 Torsvik V, Sørheim R, Goksøyr J. Total bacterial diversity in soil and sediment communities—A  
712 review. *Journal of Industrial Microbiology & Biotechnology* 1996; 17: 170-178.

713 Tripler CE, Kaushal SS, Likens GE, Walter MT. Patterns in potassium dynamics in forest ecosystems.  
714 *Ecology Letters* 2006; 9: 451-466.

715 Uroz S, Turpault MP, Van Scholl L, Palin B, Frey-Klett P. Long term impact of mineral amendment on  
716 the distribution of the mineral weathering associated bacterial communities from the beech  
717 *Scleroderma citrinum* ectomycorrhizosphere. *Soil Biology & Biochemistry* 2011; 43: 2275-2282.

718 Wang S, Li T, Zheng Z. Effect of tea plantation age on the distribution of soil organic carbon and  
719 nutrient within micro-aggregates in the hilly region of western Sichuan, China. *Ecological Engineering*  
720 2016; 90: 113-119.

721 Wang S, Li T, Zheng Z, Chen HY. Soil aggregate-associated bacterial metabolic activity and  
722 community structure in different aged tea plantations. *Science of The Total Environment* 2019; 654:  
723 1023-1032.

724 Watts DJ, Strogatz SH. Collective dynamics of 'small-world' networks. *Nature* 1998; 393: 440-442.

725 Yan P, Shen C, Fan L, Li X, Zhang L, Zhang L, et al. Tea planting affects soil acidification and  
726 nitrogen and phosphorus distribution in soil. *Agriculture, Ecosystems & Environment* 2018; 254:  
727 20-25.

728 Yan P, Wu L, Wang D, Fu J, Shen C, Li X, et al. Soil acidification in Chinese tea plantations. *Science*  
729 *of The Total Environment* 2020; 715: 136963.

730 Zhang B, Zhang J, Liu Y, Shi P, Wei G. Co-occurrence patterns of soybean rhizosphere microbiome at  
731 a continental scale. *Soil Biology & Biochemistry* 2018; 118: 178-186.

732 Zhao Z, He J, Geisen S, Han L, Wang J, Shen J, et al. Protist communities are more sensitive to

- 733 nitrogen fertilization than other microorganisms in diverse agricultural soils. *Microbiome* 2019; 7.
- 734 Zhou X, Guo Z, Chen C, Jia Z. Soil microbial community structure and diversity are largely influenced
- 735 by soil pH and nutrient quality in 78-year-old tree plantations. *Biogeosciences* 2017; 14: 2101-2111.
- 736
